# Supplementary material for: ER Unfolded Protein Response in Liver In Vivo Is Characterized by Reduced, Not Increased, De Novo Lipogenesis and Cholesterol Synthesis Rates with Uptake of Fatty Acids from Adipose Tissue: Integrated Gene Expression, Translation Rates and Metabolic Fluxes
Source: MDPI journal article supplement (doi:10.3390/ijms23031073), 2022-01-19
Supplement: s1 [file s1]

## Supplementary Figures

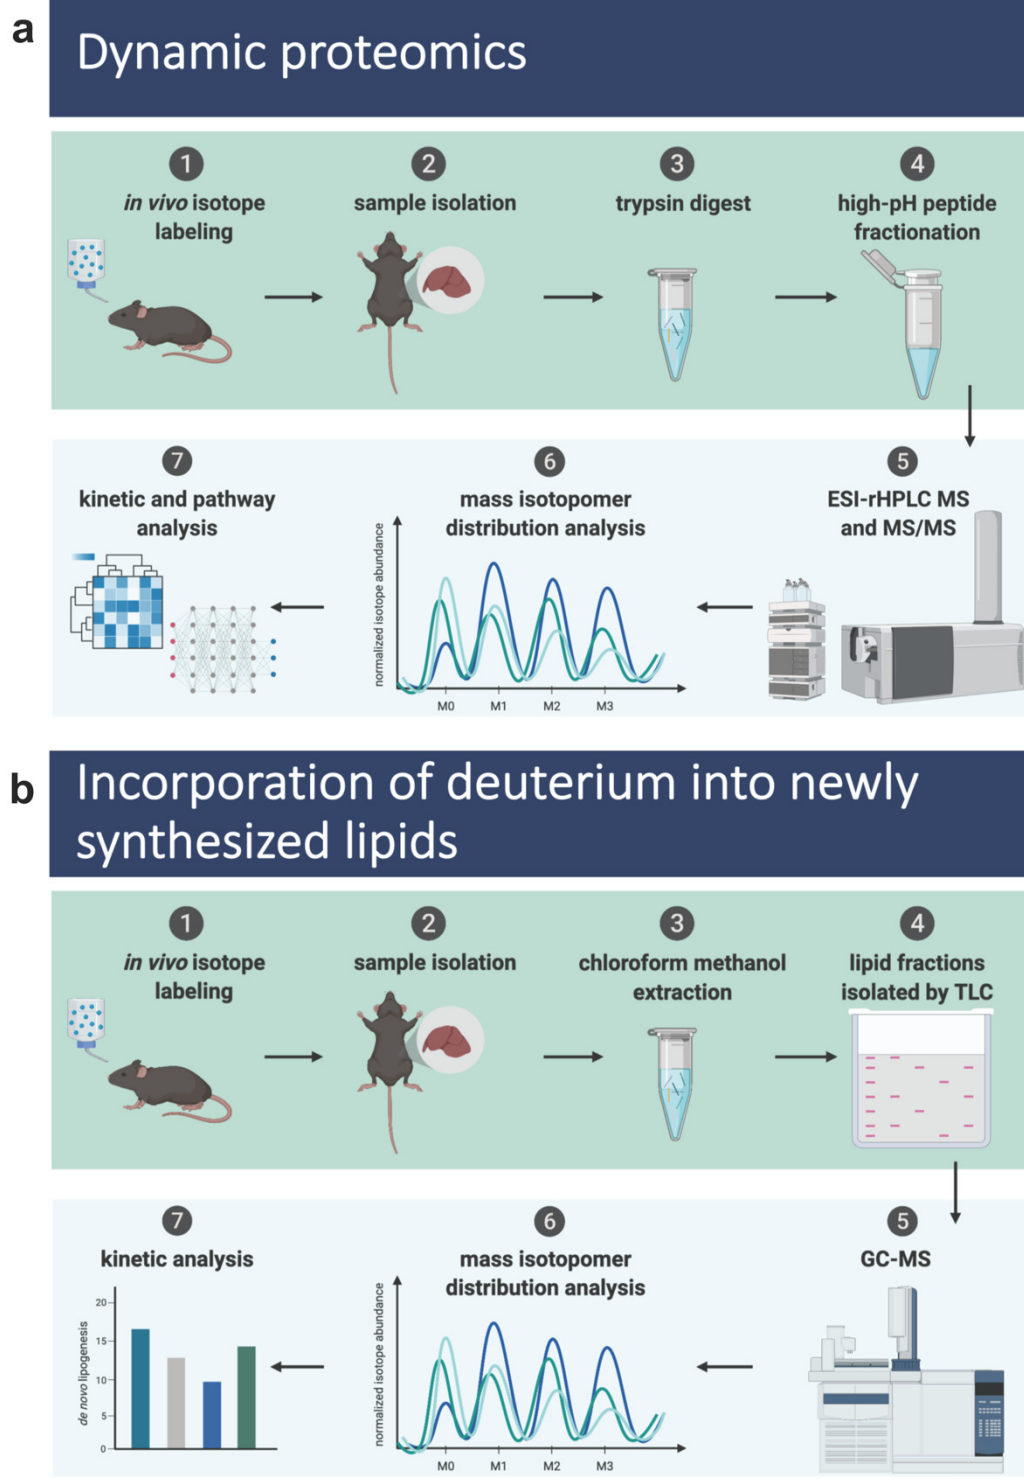

**Figure S1.** (a) Experimental overview of dynamic proteomics approach. (b) Experimental overview of measurement of *de novo* lipogenesis.

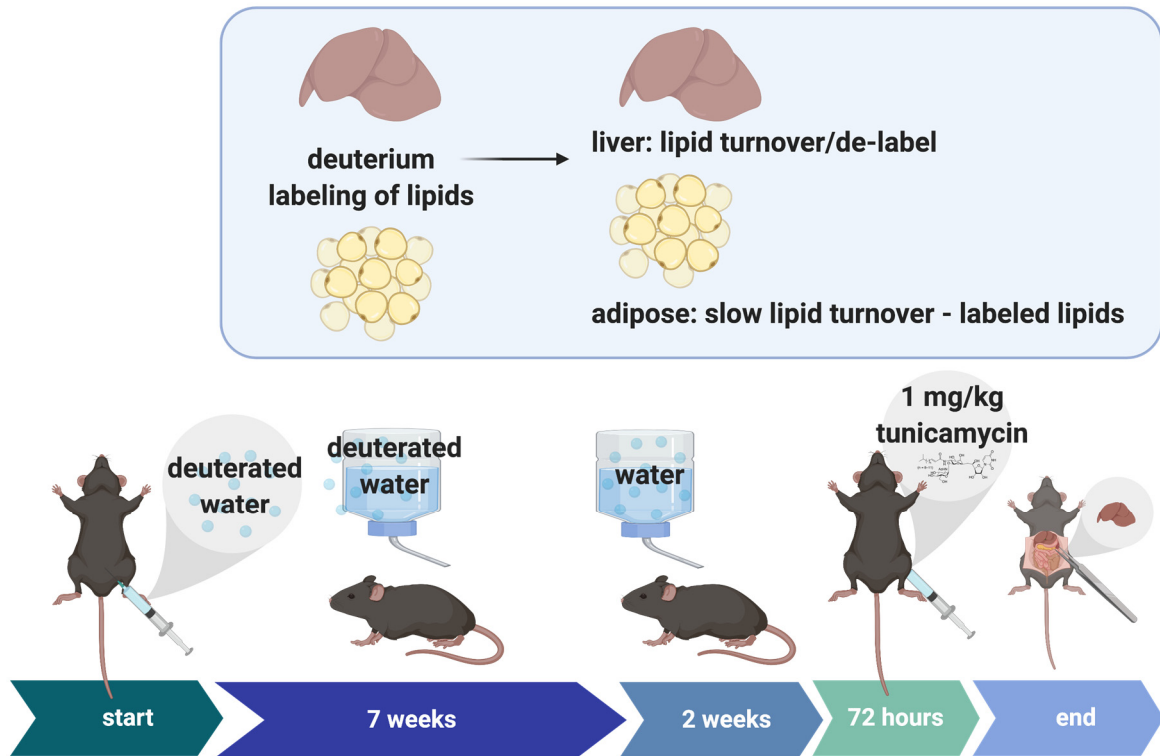

**Figure S2.** Experimental overview of pre-labeling experiment.

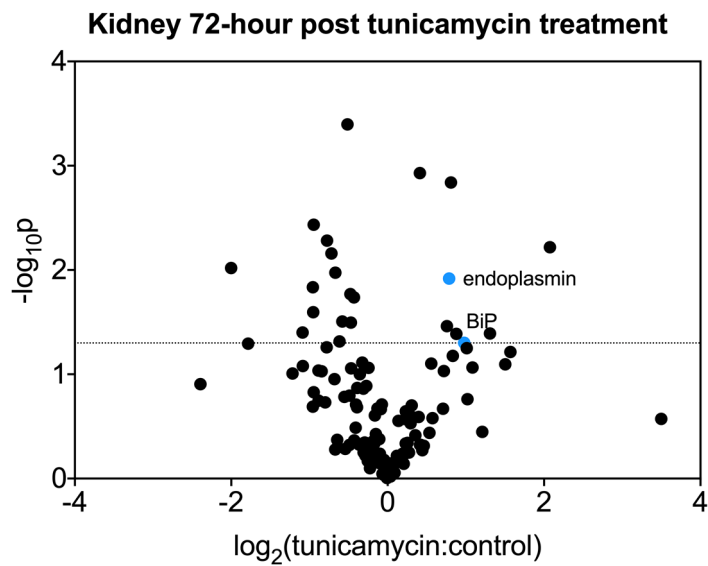

**Figure S3.** Ratio of tunicamycin:control treated mice kidneys. Volcano plot of all proteins for which fractional synthesis rates were measured 72 hrs post tunicamycin treatment. Points expressed as  $\log_2$  fold-change tunicamycin treated/control on x-axis and  $-\log_{10}(p\text{-value})$ , obtained from 2-tail t-test, on y-axis.

**Table S1.** Individual protein synthesis rate ratios of tunicamycin/control mice. Ratio of above 1 indicates a higher synthesis rate under ER stress. Ratio of below 1 indicates a lower synthesis rate under ER stress.

| Protein                                           | 6 hr ratio | 12 hr ratio | 24 hr ratio | 48 hr ratio | 72 hr ratio |
|---------------------------------------------------|------------|-------------|-------------|-------------|-------------|
| 10 kDa heat shock protein, mitochondrial          | 0.63       | 0.79        | 1.41        | 1.03        | 1.10        |
| 14-3-3 protein beta/alpha                         | 1.00       | 0.55        | 1.09        | 0.96        | 1.01        |
| 14-3-3 protein epsilon                            | 1.47       | 0.27        | 0.21        | 0.63        | 0.76        |
| 14-3-3 protein gamma                              | 3.82       | 0.56        | 1.05        | 1.01        | 1.08        |
| 14-3-3 protein zeta/delta                         | 1.25       | 0.81        | 1.32        | 1.16        | 1.29        |
| 2-aminomuconic semialdehyde dehydrogenase         | 0.91       | 1.02        | 0.32        | 0.79        | 0.92        |
| 2-hydroxyacyl-CoA lyase 1                         | 1.16       | 0.81        | 1.12        | 1.11        | 0.97        |
| 2-iminobutanoate/2-iminopropanoate deaminase      | 0.72       | 0.58        | 0.58        | 0.59        | 0.88        |
| 2,4-dienoyl-CoA reductase, mitochondrial          | 1.20       | 0.38        | 0.36        | 0.95        | 1.03        |
| 3-hydroxyanthranilate 3,4-dioxygenase             | 0.62       | 0.56        | 0.33        | 0.75        | 0.55        |
| 3-hydroxyisobutyrate dehydrogenase, mitochondrial | 1.00       | 0.80        | 1.08        | 1.30        | 1.08        |
| 3-ketoacyl-CoA thiolase A, peroxisomal            | 0.53       | 0.52        | 0.77        | 0.86        | 0.98        |
| 3-ketoacyl-CoA thiolase B, peroxisomal            | 0.61       | 0.34        | 0.69        | 0.68        | 0.94        |
| 3-ketoacyl-CoA thiolase, mitochondrial            | 0.81       | 1.55        | 0.69        | 0.57        | 0.81        |
| 4-aminobutyrate aminotransferase, mitochondrial   | 1.62       | 0.54        | 1.51        | 0.66        |             |
| 4-hydroxyphenylpyruvate dioxygenase               | 0.58       | 0.72        | 0.84        | 0.89        | 0.87        |

|                                                   |      |      |      |      |      |
|---------------------------------------------------|------|------|------|------|------|
| 4-trimethylaminobutyraldehyde dehydrogenase       | 0.42 | 0.52 | 1.26 | 0.79 | 0.83 |
| 40S ribosomal protein S17                         | 0.73 | 0.73 | 0.63 | 1.48 | 0.68 |
| 40S ribosomal protein S2                          |      |      | 0.66 | 1.48 | 1.11 |
| 40S ribosomal protein S20                         |      | 0.35 | 0.59 | 1.47 |      |
| 40S ribosomal protein S28                         | 0.35 | 1.08 | 1.46 | 1.25 | 1.63 |
| 40S ribosomal protein S3                          |      |      | 1.10 |      |      |
| 40S ribosomal protein S3a                         | 1.23 | 1.29 | 0.87 | 1.10 | 1.25 |
| 40S ribosomal protein S4, X isoform               |      |      | 3.49 |      |      |
| 40S ribosomal protein S7                          | 0.51 | 0.96 | 1.18 | 1.27 | 1.24 |
| 40S ribosomal protein S8                          | 0.73 | 4.60 | 1.09 | 1.15 | 1.29 |
| 40S ribosomal protein SA                          |      |      | 1.18 | 1.06 | 1.52 |
| 6-phosphogluconate dehydrogenase, decarboxylating | 0.96 | 1.56 | 0.94 | 0.82 | 0.88 |
| 6-phosphogluconolactonase                         | 0.54 | 0.34 | 1.11 | 0.88 | 1.01 |
| 60 kDa heat shock protein, mitochondrial          | 0.60 | 1.36 | 0.95 | 1.00 | 1.24 |
| 60S acidic ribosomal protein P0                   | 0.31 |      |      | 2.01 |      |
| 60S ribosomal protein L12                         |      | 0.24 | 1.38 | 2.00 | 1.54 |
| 60S ribosomal protein L23a                        | 0.70 |      |      | 1.19 |      |
| 60S ribosomal protein L27a                        |      |      | 0.07 | 0.28 |      |
| 60S ribosomal protein L4                          |      |      | 3.62 |      |      |
| 60S ribosomal protein L5                          | 1.21 |      | 0.30 |      |      |
| 60S ribosomal protein L6                          | 0.72 | 0.82 | 1.09 | 1.29 | 1.30 |
| Acetyl-CoA acetyltransferase, cytosolic           | 1.19 | 0.27 | 0.51 | 0.62 | 0.78 |
| Acetyl-CoA acetyltransferase, mitochondrial       | 0.43 | 0.43 | 0.91 | 0.52 | 1.47 |

|                                                    |      |      |      |      |      |
|----------------------------------------------------|------|------|------|------|------|
| Aconitate hydratase, mitochondrial                 | 1.12 | 1.21 | 1.62 | 0.86 | 0.79 |
| Actin, alpha cardiac muscle 1                      | 1.51 | 3.96 | 0.98 | 1.07 | 1.04 |
| Actin, aortic smooth muscle                        | 0.92 | 0.91 | 0.59 | 0.92 | 1.17 |
| Actin, cytoplasmic 1                               | 0.69 | 2.99 | 0.92 | 0.99 | 1.04 |
| Acyl-CoA synthetase family member 2, mitochondrial | 1.37 | 2.07 | 1.31 | 0.66 | 1.10 |
| Acyl-CoA-binding protein                           | 0.75 | 0.41 | 0.54 | 0.59 | 0.73 |
| Acyl-coenzyme A synthetase ACSM1, mitochondrial    | 0.72 | 1.38 | 0.70 | 1.01 | 0.82 |
| Adenosine kinase                                   | 0.67 | 0.74 | 0.91 | 1.00 | 1.21 |
| Adenosylhomocysteinase                             | 0.53 | 1.92 | 0.94 | 0.98 | 1.06 |
| Adenylate kinase 2, mitochondrial                  | 0.95 | 0.61 | 0.82 | 0.74 | 0.65 |
| ADP/ATP translocase 2                              | 0.98 | 0.93 | 0.76 | 0.76 | 0.93 |
| Alanine aminotransferase 1                         | 0.60 | 0.95 | 1.21 | 1.03 | 0.84 |
| Alcohol dehydrogenase 1                            | 0.61 | 0.68 | 0.49 | 0.33 | 0.52 |
| Alcohol dehydrogenase class-3                      | 0.98 | 0.94 | 1.02 | 0.65 | 0.90 |
| Aldehyde dehydrogenase family 3 member A2          | 0.74 | 0.55 | 0.89 | 0.89 | 0.79 |
| Aldehyde dehydrogenase, cytosolic 1                | 0.74 | 1.37 | 0.62 | 0.67 | 0.62 |
| Aldehyde dehydrogenase, mitochondrial              | 0.54 | 0.79 | 0.80 | 0.72 | 0.86 |
| Aldehyde oxidase 3                                 | 0.92 | 0.93 | 0.55 | 0.72 | 0.61 |
| Aldo-keto reductase family 1 member A1             | 1.33 | 1.19 | 1.31 | 0.75 | 0.98 |
| Aldo-keto reductase family 1 member C13            | 0.83 | 6.33 | 0.59 | 0.53 |      |
| Alpha-aminoadipic semialdehyde dehydrogenase       | 0.87 | 0.64 | 0.65 | 0.63 | 0.69 |

|                                                        |      |      |      |      |      |
|--------------------------------------------------------|------|------|------|------|------|
| Alpha-aminoadipic semialdehyde synthase, mitochondrial | 0.80 | 0.91 | 1.15 | 0.93 | 1.19 |
| Alpha-enolase                                          | 0.65 | 1.09 | 0.59 | 0.67 | 0.81 |
| Annexin A5                                             | 0.92 |      |      | 1.17 |      |
| Arginase-1                                             | 0.55 | 1.44 | 0.53 | 0.88 | 1.02 |
| Argininosuccinate lyase                                | 1.08 | 1.93 | 0.57 | 0.60 | 0.79 |
| Argininosuccinate synthase                             | 0.56 | 0.60 | 0.89 | 1.18 | 1.12 |
| Aspartate aminotransferase, cytoplasmic                | 1.03 | 2.95 | 1.64 | 1.70 | 1.72 |
| Aspartate aminotransferase, mitochondrial              | 0.74 | 1.94 | 0.93 | 0.85 | 1.07 |
| ATP synthase F(0) complex subunit B1, mitochondrial    |      |      | 0.37 | 0.47 | 0.95 |
| ATP synthase subunit alpha, mitochondrial              | 0.72 | 0.59 | 0.84 | 0.81 | 0.89 |
| ATP synthase subunit beta, mitochondrial               | 0.59 | 2.33 | 0.53 | 0.78 | 1.01 |
| ATP synthase subunit d, mitochondrial                  | 0.63 | 0.45 | 0.76 | 0.78 | 0.90 |
| ATP synthase subunit delta, mitochondrial              | 0.87 | 1.00 | 0.60 | 1.44 | 0.89 |
| ATP synthase subunit O, mitochondrial                  | 2.12 | 1.02 | 0.61 | 0.71 | 1.01 |
| ATP-citrate synthase                                   | 0.83 |      |      | 0.54 |      |
| Beta-actin-like protein 2                              | 0.80 | 2.73 | 0.91 | 0.92 | 1.03 |
| Betaine--homocysteine S-methyltransferase 1            | 0.60 | 1.47 | 0.71 | 1.24 | 0.94 |
| Bifunctional epoxide hydrolase 2                       | 0.70 | 0.80 | 1.15 | 0.89 | 0.98 |
| Bile acyl-CoA synthetase                               | 5.48 | 0.24 | 0.40 | 0.96 | 1.00 |

|                                                            |      |      |      |      |      |
|------------------------------------------------------------|------|------|------|------|------|
| C-1-tetrahydrofolate synthase,<br>cytoplasmic              | 1.24 | 1.24 | 0.57 | 0.49 | 1.11 |
| Calcium-binding mitochondrial carrier<br>protein Aralar2   | 1.25 | 2.21 | 0.88 | 0.66 | 1.04 |
| Calreticulin                                               | 1.45 | 2.36 | 2.38 | 1.96 | 1.63 |
| Carbamoyl-phosphate synthase<br>[ammonia], mitochondrial   | 0.63 | 1.08 | 0.57 | 0.66 | 0.74 |
| Carbonic anhydrase 3                                       | 0.76 | 0.68 | 0.29 | 0.24 | 0.36 |
| Carboxylesterase 1D                                        | 0.48 | 0.58 | 0.29 | 0.26 | 0.40 |
| Carboxylesterase 1F                                        | 0.66 | 0.32 | 0.39 | 0.36 | 0.43 |
| Carboxylesterase 3A                                        | 0.58 | 0.59 | 0.62 | 0.45 | 0.56 |
| Carboxylesterase 3B                                        | 0.63 | 0.66 | 0.63 | 0.54 | 0.54 |
| Catalase                                                   | 0.59 | 1.23 | 0.65 | 0.86 | 0.94 |
| Catechol O-methyltransferase                               | 0.70 | 1.31 | 0.49 | 0.80 |      |
| Clathrin heavy chain 1                                     | 1.49 | 0.65 | 2.30 | 1.53 | 1.11 |
| Cystathionine gamma-lyase                                  | 0.87 | 0.94 | 1.06 | 1.43 | 1.28 |
| Cysteine sulfinic acid decarboxylase                       | 0.75 | 0.66 | 0.37 | 0.35 | 0.46 |
| Cytochrome b-c1 complex subunit 1,<br>mitochondrial        | 0.95 | 0.70 | 0.97 | 0.70 | 0.87 |
| Cytochrome b-c1 complex subunit 2,<br>mitochondrial        |      |      | 0.44 |      |      |
| Cytochrome b-c1 complex subunit 6,<br>mitochondrial        | 0.44 | 0.65 | 0.54 | 0.71 | 0.77 |
| Cytochrome b5                                              | 0.79 | 1.59 | 0.91 | 0.95 | 1.10 |
| Cytochrome c oxidase subunit 2                             | 0.55 | 1.31 | 0.95 | 0.84 | 1.04 |
| Cytochrome c oxidase subunit 4 isoform<br>1, mitochondrial | 0.80 |      |      | 0.96 |      |

|                                                                 |      |      |      |      |      |
|-----------------------------------------------------------------|------|------|------|------|------|
| Cytochrome c1, heme protein,<br>mitochondrial                   | 0.65 | 1.90 |      | 1.39 | 0.86 |
| Cytochrome P450 1A2                                             | 0.50 | 0.69 | 0.95 |      |      |
| Cytochrome P450 2A12                                            | 1.01 |      | 1.43 |      | 1.23 |
| Cytochrome P450 2C29                                            | 0.51 | 0.57 | 0.47 | 0.42 | 0.73 |
| Cytochrome P450 2D10                                            | 0.65 | 0.74 | 0.89 | 0.79 | 1.24 |
| Cytochrome P450 2D26                                            | 0.75 | 0.53 | 1.21 | 1.04 | 1.24 |
| Cytochrome P450 2D9                                             | 0.75 | 0.85 | 0.94 | 0.76 | 1.21 |
| Cytochrome P450 2E1                                             | 0.73 | 0.91 | 0.97 | 1.04 | 0.99 |
| Cytochrome P450 2F2                                             | 0.57 | 0.59 | 0.69 | 0.51 | 0.76 |
| Cytochrome P450 3A11                                            | 0.70 | 0.80 | 0.83 | 0.92 | 1.02 |
| Cytoplasmic aconitate hydratase                                 | 0.78 | 0.72 | 0.46 | 0.57 | 1.00 |
| Cytosol aminopeptidase                                          | 1.04 | 0.71 | 0.87 | 0.95 | 1.23 |
| Cytosolic 10-formyltetrahydrofolate<br>dehydrogenase            | 0.45 | 1.11 | 0.55 | 0.74 | 0.89 |
| D-beta-hydroxybutyrate<br>dehydrogenase, mitochondrial          | 0.61 | 0.43 | 0.67 | 0.60 | 0.95 |
| D-dopachrome decarboxylase                                      | 0.81 | 1.72 | 1.11 | 1.17 | 1.00 |
| Delta-1-pyrroline-5-carboxylate<br>dehydrogenase, mitochondrial | 0.94 | 2.14 | 0.68 | 0.71 | 0.91 |
| Dihydrolipoyl dehydrogenase,<br>mitochondrial                   | 1.28 | 0.65 | 1.42 | 0.61 | 1.22 |
| Dihydropteridine reductase                                      | 1.73 | 0.48 | 0.79 | 0.82 |      |
| Dihydropyrimidinase                                             | 0.50 | 0.52 | 0.47 | 0.40 |      |
| Dimethylaniline monooxygenase [N-<br>oxide-forming] 5           | 0.77 | 0.83 | 0.73 | 0.72 | 0.83 |
| Dimethylglycine dehydrogenase,<br>mitochondrial                 | 2.95 | 0.69 | 0.74 | 0.78 | 0.72 |



|                                                                         |      |      |      |      |      |
|-------------------------------------------------------------------------|------|------|------|------|------|
| Electron transfer flavoprotein subunit alpha, mitochondrial             | 1.16 | 0.80 | 0.74 | 0.75 | 0.82 |
| Electron transfer flavoprotein subunit beta                             | 0.79 | 0.86 | 1.03 | 0.70 | 0.85 |
| Electron transfer flavoprotein-ubiquinone oxidoreductase, mitochondrial |      |      |      | 0.82 |      |
| Elongation factor 1-alpha 1                                             | 0.55 | 0.68 | 0.90 | 0.88 | 1.26 |
| Elongation factor 1-alpha 2                                             | 0.75 |      | 1.24 | 0.85 | 1.73 |
| Elongation factor 1-beta                                                | 1.09 | 1.00 | 1.99 | 0.94 |      |
| Elongation factor 1-delta                                               | 0.96 | 1.25 | 1.16 | 1.54 | 1.42 |
| Elongation factor 1-gamma                                               | 4.50 | 0.87 | 1.23 | 1.46 | 1.33 |
| Elongation factor 2                                                     | 0.53 | 0.60 | 0.89 | 0.84 | 1.08 |
| Endoplasmic reticulum chaperone BiP                                     | 4.00 | 3.10 | 2.70 | 1.93 | 1.75 |
| Endoplasmin                                                             | 2.73 | 3.13 | 2.89 | 1.86 | 1.60 |
| Enoyl-CoA delta isomerase 1, mitochondrial                              | 0.26 | 0.95 | 1.21 | 0.84 | 0.92 |
| Enoyl-CoA hydratase, mitochondrial                                      | 1.85 |      | 2.30 | 0.25 | 0.72 |
| Epoxide hydrolase 1                                                     | 0.81 | 0.70 | 0.69 | 0.69 | 0.80 |
| Estradiol 17 beta-dehydrogenase 5                                       | 0.44 | 1.68 | 0.49 | 0.30 | 0.54 |
| Farnesyl pyrophosphate synthase                                         | 0.80 | 1.50 | 1.18 | 1.49 | 1.12 |
| Fatty acid synthase                                                     | 0.52 | 0.57 | 0.42 | 0.37 | 0.71 |
| Fatty acid-binding protein, liver                                       | 0.58 | 0.89 | 0.28 | 0.33 | 0.52 |
| Ferritin light chain 1                                                  | 0.63 | 1.10 | 1.15 | 1.13 | 1.04 |
| Fibrinogen gamma chain                                                  | 1.09 |      | 2.26 | 2.53 | 1.93 |
| Flavin reductase (NADPH)                                                | 1.39 | 0.14 | 0.98 | 0.50 | 0.96 |

|                                           |      |      |      |      |      |
|-------------------------------------------|------|------|------|------|------|
| Formimidoyltransferase-cyclodeaminase     | 0.80 | 1.27 | 1.05 | 0.98 | 1.03 |
| Fructose-1,6-bisphosphatase 1             | 0.81 | 0.67 | 1.11 | 1.45 | 1.32 |
| Fructose-bisphosphate aldolase B          | 0.69 | 0.84 | 1.05 | 1.08 | 1.02 |
| Fumarate hydratase, mitochondrial         | 0.58 | 1.00 | 1.20 | 0.87 | 1.30 |
| Fumarylacetoacetase                       | 0.75 | 0.70 | 0.75 | 0.88 | 1.00 |
| Glucose-6-phosphate isomerase             |      |      | 1.39 | 0.45 | 0.68 |
| Glutamate dehydrogenase 1, mitochondrial  | 0.57 | 0.84 | 0.44 | 0.43 | 0.56 |
| Glutamine synthetase                      | 0.82 | 1.33 | 0.64 | 0.37 | 0.28 |
| Glutaryl-CoA dehydrogenase, mitochondrial | 0.98 | 0.50 | 0.95 | 1.69 | 1.09 |
| Glutathione peroxidase 1                  | 0.92 | 0.61 | 0.44 | 0.61 | 0.62 |
| Glutathione S-transferase A1              |      |      |      | 0.25 | 0.68 |
| Glutathione S-transferase A3              | 0.46 | 1.40 | 0.51 | 0.45 | 0.59 |
| Glutathione S-transferase A4              | 0.50 | 0.52 | 0.62 | 0.29 | 0.44 |
| Glutathione S-transferase Mu 1            | 0.69 | 3.79 | 1.23 | 0.96 | 0.95 |
| Glutathione S-transferase Mu 2            | 0.13 | 0.58 | 1.35 | 0.97 | 0.99 |
| Glutathione S-transferase Mu 3            | 0.51 | 3.66 | 1.31 | 0.99 | 1.06 |
| Glutathione S-transferase P 1             | 0.74 | 2.34 | 0.72 | 0.40 | 0.49 |
| Glutathione S-transferase P 2             | 0.68 | 1.85 | 0.61 | 0.38 | 0.59 |
| Glyceraldehyde-3-phosphate dehydrogenase  | 0.54 | 0.59 | 1.19 | 0.87 | 1.11 |
| Glycerol-3-phosphate dehydrogenase [NAD(  | 0.26 |      |      |      |      |
| Glycine N-acyltransferase                 | 1.73 | 1.81 | 1.11 | 0.76 | 0.97 |
| Glycine N-methyltransferase               | 0.66 | 1.33 | 0.94 | 1.15 | 1.23 |

|                                                     |      |      |      |      |      |
|-----------------------------------------------------|------|------|------|------|------|
| Glycogen phosphorylase, liver form                  | 0.87 | 0.60 | 0.70 | 0.42 | 0.62 |
| Glyoxylate reductase/hydroxypyruvate reductase      | 0.58 | 0.50 | 0.73 | 0.94 | 0.95 |
| GTP:AMP phosphotransferase AK3, mitochondrial       |      |      | 0.24 | 0.23 | 1.82 |
| Heat shock 70 kDa protein 1-like                    |      | 0.90 | 1.25 | 0.88 | 1.74 |
| Heat shock cognate 71 kDa protein                   | 0.93 | 0.58 | 0.92 | 1.07 | 1.01 |
| Heat shock protein HSP 90-alpha                     | 0.73 | 0.31 | 0.72 | 0.81 | 0.95 |
| Heat shock protein HSP 90-beta                      | 0.70 | 0.61 | 0.77 | 0.97 | 0.93 |
| Hemoglobin subunit alpha                            | 1.36 | 1.37 | 1.14 | 1.41 | 0.44 |
| Hemoglobin subunit beta-1                           | 0.78 | 4.18 | 1.36 | 0.47 | 0.53 |
| Hemoglobin subunit beta-2                           | 0.36 | 1.25 | 1.73 | 0.21 | 0.42 |
| Histidine ammonia-lyase                             | 0.61 | 0.71 | 0.52 | 0.67 | 0.93 |
| Histidine triad nucleotide-binding protein 1        | 0.92 | 1.08 | 1.17 | 1.20 | 1.26 |
| Homogentisate 1,2-dioxygenase                       | 0.84 | 0.60 | 0.50 | 0.69 | 0.82 |
| Hydroxyacyl-coenzyme A dehydrogenase, mitochondrial | 1.33 | 0.85 | 0.46 | 0.62 | 0.56 |
| Hydroxymethylglutaryl-CoA lyase, mitochondrial      | 0.63 | 2.54 | 1.01 | 0.78 | 1.12 |
| Hydroxymethylglutaryl-CoA synthase, mitochondrial   | 0.60 | 2.19 | 0.80 | 0.86 | 1.12 |
| Hypoxia up-regulated protein 1                      | 0.51 | 1.49 | 2.93 | 2.04 | 1.73 |
| Indolethylamine N-methyltransferase                 | 1.99 | 0.62 | 0.38 | 0.30 | 0.41 |
| Interleukin-12 receptor subunit beta-2              | 0.97 | 0.81 | 0.74 | 0.57 | 0.90 |
| Isochorismatase domain-containing protein 2A        | 0.52 | 1.27 | 1.09 | 1.64 | 1.38 |

|                                                                                                                  |      |      |      |      |      |
|------------------------------------------------------------------------------------------------------------------|------|------|------|------|------|
| Isocitrate dehydrogenase [NADP]<br>cytoplasmic                                                                   | 1.62 | 0.91 | 0.77 | 0.65 | 0.90 |
| Isovaleryl-CoA dehydrogenase,<br>mitochondrial                                                                   | 0.42 |      | 0.56 | 1.00 | 0.95 |
| L-lactate dehydrogenase A chain                                                                                  | 0.81 | 0.40 | 0.44 | 0.74 | 1.40 |
| Lactoylglutathione lyase                                                                                         | 0.44 | 0.57 | 0.55 | 0.47 | 0.80 |
| Lipoamide acyltransferase component of<br>branched-chain alpha-keto acid<br>dehydrogenase complex, mitochondrial |      | 0.36 | 0.82 | 1.09 | 1.52 |
| Liver carboxylesterase 1                                                                                         | 0.32 | 0.86 | 0.58 | 0.26 | 0.44 |
| Lon protease homolog, mitochondrial                                                                              |      |      |      | 4.83 |      |
| Long-chain-fatty-acid--CoA ligase 1                                                                              | 0.77 | 0.84 | 0.35 | 0.48 | 0.67 |
| Lysine-specific demethylase 5A                                                                                   | 0.92 |      |      |      |      |
| Macrophage migration inhibitory factor                                                                           | 0.25 | 0.30 | 1.56 | 1.23 | 1.22 |
| Major urinary protein 1                                                                                          | 0.81 | 0.96 | 0.79 | 0.91 | 0.86 |
| Major urinary protein 11                                                                                         | 0.79 | 0.96 | 0.97 | 0.87 | 0.99 |
| Major urinary protein 17                                                                                         | 0.80 | 0.95 | 1.01 | 0.94 | 0.84 |
| Major urinary protein 18                                                                                         | 0.82 | 0.96 | 0.76 | 0.97 | 0.83 |
| Major urinary protein 2                                                                                          | 0.84 | 0.95 | 0.79 | 0.92 | 0.93 |
| Malate dehydrogenase, cytoplasmic                                                                                | 0.99 | 1.99 | 1.14 | 1.27 | 1.10 |
| Malate dehydrogenase, mitochondrial                                                                              | 0.85 | 0.45 | 1.57 | 1.43 | 1.38 |
| Maleylacetoacetate isomerase                                                                                     | 0.60 | 0.91 | 0.89 | 0.99 | 1.00 |
| Mediator of RNA polymerase II<br>transcription subunit 23                                                        |      |      | 0.42 | 0.21 |      |
| Medium-chain specific acyl-CoA<br>dehydrogenase, mitochondrial                                                   | 0.48 | 0.61 | 0.94 | 0.87 | 1.02 |

|                                                                             |      |      |      |      |      |
|-----------------------------------------------------------------------------|------|------|------|------|------|
| Membrane-associated progesterone receptor component 1                       | 0.79 | 0.37 | 1.17 | 0.53 | 1.22 |
| Methanethiol oxidase                                                        | 0.73 | 0.62 | 0.37 | 0.40 | 0.44 |
| Methylmalonate-semialdehyde dehydrogenase [acylating], mitochondrial        | 1.17 | 0.89 | 0.86 | 0.94 | 1.20 |
| Methyltransferase-like protein 7B                                           |      |      | 2.30 | 1.52 | 1.32 |
| Microsomal glutathione S-transferase 1                                      | 1.07 | 0.60 | 0.53 | 0.42 |      |
| Microsomal triglyceride transfer protein large subunit                      | 2.54 |      | 0.95 |      |      |
| Microtubule-associated protein 2                                            |      | 0.90 | 1.03 | 1.35 | 1.25 |
| Multiple epidermal growth factor-like domains protein 8                     | 1.38 | 0.74 | 0.96 | 0.45 | 0.73 |
| NAD-dependent protein deacetylase sirtuin-3                                 |      | 1.28 | 0.44 | 0.59 |      |
| NADH dehydrogenase [ubiquinone] 1 alpha subcomplex subunit 9, mitochondrial |      |      | 0.79 | 0.87 |      |
| NADH-cytochrome b5 reductase 3                                              | 1.03 | 0.09 | 0.51 | 0.50 | 0.75 |
| NADH-ubiquinone oxidoreductase 75 kDa subunit, mitochondrial                | 0.85 |      |      | 0.89 |      |
| NADPH--cytochrome P450 reductase                                            | 0.88 | 1.20 | 0.68 | 0.64 |      |
| Nesprin-1                                                                   |      |      |      | 0.45 |      |
| Nicotinate-nucleotide pyrophosphorylase [carboxylating]                     | 0.85 | 0.25 | 0.73 |      | 0.89 |
| Non-specific lipid-transfer protein                                         | 0.59 | 0.56 | 0.60 | 0.57 | 0.81 |
| Nucleoside diphosphate kinase A                                             | 0.73 |      |      | 1.23 |      |
| Nucleoside diphosphate kinase B                                             | 0.74 | 0.56 | 1.86 | 1.43 | 1.34 |

|                                                         |      |      |      |      |      |
|---------------------------------------------------------|------|------|------|------|------|
| Ornithine aminotransferase, mitochondrial               | 0.59 | 0.67 | 0.87 | 0.94 | 1.06 |
| Ornithine carbamoyltransferase, mitochondrial           | 1.16 | 2.37 | 0.36 | 0.35 | 0.53 |
| Peptidyl-prolyl cis-trans isomerase A                   | 0.83 | 0.39 | 1.02 | 0.77 | 0.95 |
| Peptidyl-prolyl cis-trans isomerase B                   |      |      | 1.45 | 1.55 | 1.22 |
| Peroxiredoxin-1                                         | 0.69 | 0.51 | 0.59 | 0.76 | 1.01 |
| Peroxiredoxin-2                                         | 0.46 | 0.17 | 0.78 | 0.68 | 1.33 |
| Peroxiredoxin-5, mitochondrial                          | 1.12 | 1.98 | 0.73 | 0.73 | 0.81 |
| Peroxiredoxin-6                                         | 0.86 | 0.78 | 0.72 | 0.67 | 0.81 |
| Peroxisomal acyl-coenzyme A oxidase 1                   | 0.62 | 0.71 | 0.86 | 1.13 | 1.29 |
| Peroxisomal bifunctional enzyme                         | 1.06 | 0.80 | 0.66 | 1.10 | 1.13 |
| Peroxisomal multifunctional enzyme type 2               | 1.10 | 0.51 | 1.16 | 1.35 | 1.59 |
| Phenazine biosynthesis-like domain-containing protein 1 | 0.69 | 0.84 | 0.77 | 0.62 | 0.63 |
| Phenazine biosynthesis-like domain-containing protein 2 | 0.70 | 0.81 | 0.62 | 0.71 | 0.69 |
| Phenylalanine-4-hydroxylase                             | 0.56 | 0.72 | 0.99 | 0.88 | 1.09 |
| Phosphoglucomutase-1                                    | 0.80 | 0.47 | 0.81 | 0.82 | 1.06 |
| Phosphoglycerate kinase 1                               | 0.81 | 0.86 | 1.27 | 1.18 | 1.26 |
| Phosphoglycerate mutase 1                               | 0.84 | 0.49 | 1.27 | 0.72 | 0.91 |
| Polyubiquitin-B                                         | 0.74 | 1.07 | 1.06 | 1.10 | 1.22 |
| Pregnancy zone protein                                  | 0.63 |      |      | 1.23 |      |
| Probable helicase senataxin                             | 0.44 | 0.44 |      | 0.38 | 0.63 |
| Probable imidazolonepropionase                          |      |      |      | 1.21 |      |
| Profilin-1                                              | 0.65 | 1.65 |      |      |      |

|                                              |      |      |      |      |      |
|----------------------------------------------|------|------|------|------|------|
| Prohibitin                                   | 0.55 | 0.54 | 1.80 | 0.93 | 0.84 |
| Protein ABHD14B                              |      | 0.70 | 0.82 |      | 0.85 |
| Protein disulfide-isomerase                  | 0.92 | 1.36 | 2.10 | 1.68 | 1.52 |
| Protein disulfide-isomerase A3               | 1.18 | 2.20 | 2.33 | 1.62 | 1.51 |
| Protein disulfide-isomerase A4               | 2.26 | 1.88 | 2.14 | 2.11 | 1.89 |
| Protein disulfide-isomerase A6               | 1.49 | 1.68 | 1.92 | 2.21 | 1.55 |
| Protein NDRG2                                | 0.94 |      |      | 0.92 |      |
| Protein PRRC2A                               |      |      |      |      |      |
| Protein/nucleic acid deglycase DJ-1          | 1.92 |      | 1.10 |      | 0.95 |
| Pyrethroid hydrolase Ces2a                   | 0.57 | 0.59 | 0.63 | 0.42 | 0.76 |
| Pyruvate carboxylase, mitochondrial          | 0.72 | 0.79 | 0.83 | 0.82 | 1.07 |
| Pyruvate kinase PKLR                         | 0.54 | 2.33 | 1.09 | 0.40 |      |
| Rab GDP dissociation inhibitor beta          | 1.27 | 0.93 | 1.06 |      |      |
| Radixin                                      |      |      |      | 1.07 |      |
| Ras-related protein Rab-1A                   | 0.94 |      |      | 1.09 |      |
| Regucalcin                                   | 0.88 | 2.28 | 0.61 | 0.33 | 0.46 |
| Retinal dehydrogenase 1                      | 0.53 | 1.46 | 0.56 | 0.67 | 0.77 |
| Rho GDP-dissociation inhibitor 1             | 0.47 | 2.28 | 0.78 | 0.75 | 0.90 |
| S-adenosylmethionine synthase isoform type-1 | 0.65 | 0.71 | 1.34 | 1.18 | 1.21 |
| S-formylglutathione hydrolase                | 0.97 | 0.71 | 0.99 | 1.02 | 1.14 |
| Sarcosine dehydrogenase, mitochondrial       | 0.81 | 0.81 | 0.92 | 1.02 | 1.17 |
| SEC14-like protein 2                         | 0.84 | 0.77 | 1.04 | 0.74 | 0.90 |
| Selenium-binding protein 2                   | 0.61 | 0.79 | 0.41 | 0.39 | 0.41 |
| Sepiapterin reductase                        |      |      | 1.35 | 1.00 | 1.28 |

|                                                                          |      |      |      |      |      |
|--------------------------------------------------------------------------|------|------|------|------|------|
| Serine protease inhibitor A3K                                            | 0.34 | 0.37 | 0.46 | 0.50 | 0.38 |
| Serine protease inhibitor A3M                                            | 0.32 | 0.33 | 0.25 | 0.45 | 0.05 |
| Serotransferrin                                                          | 0.35 | 0.28 | 0.45 |      | 0.85 |
| Serum albumin                                                            | 0.34 | 1.87 | 0.51 | 0.39 | 0.67 |
| Short-chain specific acyl-CoA dehydrogenase, mitochondrial               | 1.00 | 0.68 | 1.27 | 0.67 | 0.70 |
| Sorbitol dehydrogenase                                                   | 0.71 | 0.68 | 0.60 | 0.65 | 0.85 |
| Staphylococcal nuclease domain-containing protein 1                      | 0.47 | 0.21 | 1.92 | 2.10 | 1.22 |
| START domain-containing protein 10                                       | 1.32 | 0.29 | 0.66 | 0.77 |      |
| Stress-70 protein, mitochondrial                                         | 0.84 | 1.13 | 1.92 | 1.22 | 1.21 |
| Succinate dehydrogenase [ubiquinone] flavoprotein subunit, mitochondrial | 0.74 | 0.55 | 0.68 | 0.88 | 0.93 |
| Succinate--CoA ligase [GDP-forming] subunit beta, mitochondrial          | 1.12 | 0.78 | 0.97 | 0.94 | 0.93 |
| Succinate-semialdehyde dehydrogenase, mitochondrial                      | 1.29 | 0.53 | 0.38 | 0.60 | 0.88 |
| Superoxide dismutase [Cu-Zn]                                             | 0.80 | 2.34 | 0.52 | 0.71 | 0.87 |
| Superoxide dismutase [Mn], mitochondrial                                 | 1.60 |      | 0.98 | 0.58 | 0.81 |
| T-complex protein 1 subunit gamma                                        | 1.02 | 2.47 | 1.00 | 0.97 | 0.80 |
| T-complex protein 1 subunit zeta                                         | 0.92 | 0.54 | 1.02 | 0.99 | 0.96 |
| Thioredoxin domain-containing protein 12                                 | 0.45 | 0.32 | 0.35 | 0.53 | 0.58 |
| Thiosulfate sulfurtransferase                                            | 0.64 | 0.85 | 0.82 | 0.74 | 0.85 |
| Trans-1,2-dihydrobenzene-1,2-diol dehydrogenase                          |      | 0.66 | 0.78 | 0.69 | 1.04 |



|                                                   |      |      |      |      |      |
|---------------------------------------------------|------|------|------|------|------|
| Transitional endoplasmic reticulum ATPase         | 1.08 | 1.95 | 1.59 | 0.95 | 1.29 |
| Transketolase                                     | 0.89 | 1.34 | 0.68 | 0.60 | 0.55 |
| Trifunctional enzyme subunit alpha, mitochondrial | 0.97 | 2.78 | 0.66 | 0.85 | 0.96 |
| Trifunctional enzyme subunit beta, mitochondrial  | 0.62 | 0.90 | 0.73 | 0.92 | 0.96 |
| Triokinase/FMN cyclase                            | 0.75 | 0.98 | 0.70 | 0.65 | 0.82 |
| Triosephosphate isomerase                         | 0.76 | 0.83 | 0.60 | 0.78 | 0.78 |
| Tripeptidyl-peptidase 1                           | 5.36 |      |      | 0.14 |      |
| Tubulin alpha-1A chain                            |      | 0.96 | 1.17 | 0.80 | 0.86 |
| Tubulin alpha-1B chain                            | 1.09 | 0.84 | 1.09 | 0.73 | 0.66 |
| Tubulin alpha-1C chain                            | 1.03 | 0.72 | 0.92 | 0.69 | 0.71 |
| Tubulin alpha-4A chain                            | 0.75 | 1.48 | 0.93 | 0.69 | 0.61 |
| Tubulin alpha-8 chain                             | 0.60 | 1.07 | 0.65 |      | 0.61 |
| Tubulin beta-2A chain                             | 0.85 | 1.30 | 1.38 | 1.23 | 1.09 |
| Tubulin beta-2B chain                             |      |      |      |      | 1.36 |
| Tubulin beta-4A chain                             |      | 1.28 | 2.31 | 1.19 | 1.22 |
| Tubulin beta-4B chain                             | 1.11 | 1.45 | 1.49 | 1.38 | 1.42 |
| Tubulin beta-5 chain                              | 2.20 | 1.48 | 1.63 | 1.18 | 1.68 |
| Ubiquitin-40S ribosomal protein S27a              | 0.53 | 0.63 | 1.25 | 0.49 | 1.10 |
| Ubiquitin-like modifier-activating enzyme 1       | 0.78 | 1.16 | 1.01 | 1.11 | 1.22 |
| UDP-glucose 6-dehydrogenase                       | 1.52 | 0.72 | 0.48 | 0.54 | 0.87 |
| UDP-glucuronosyltransferase 1-1                   | 0.69 | 0.82 | 0.78 | 1.14 | 1.30 |
| UDP-glucuronosyltransferase 1-6                   |      | 0.30 | 0.92 |      | 1.37 |
| UDP-glucuronosyltransferase 1-9                   | 0.55 | 1.21 | 1.15 | 1.10 | 1.29 |

|                                                                   |      |      |      |      |      |
|-------------------------------------------------------------------|------|------|------|------|------|
| UDP-glucuronosyltransferase 2B17                                  | 0.58 | 0.80 | 0.63 | 0.94 | 1.02 |
| Uricase                                                           | 0.59 | 0.60 | 0.88 | 0.96 |      |
| Urocanate hydratase                                               | 0.59 | 0.58 | 0.37 | 0.52 | 0.40 |
| UTP--glucose-1-phosphate<br>uridylyltransferase                   | 0.74 | 0.91 | 1.22 | 1.05 | 1.07 |
| Valacyclovir hydrolase                                            | 0.67 | 0.60 | 0.48 | 0.56 | 0.72 |
| Very long-chain acyl-CoA synthetase                               | 0.99 | 0.71 | 0.61 | 0.90 | 0.99 |
| Very long-chain specific acyl-CoA<br>dehydrogenase, mitochondrial | 0.86 | 1.21 | 0.84 | 0.87 | 1.08 |
| Vitamin D-binding protein                                         | 0.68 | 0.86 | 0.92 | 4.66 |      |
